# Supplementary material
Source: publisher site journal article supplement (https://www.degruyter.com/publication/journal_key/COMP/downloadAsset/COMP_CFP%20Modern%20Application%20on%20Information%20and%20Communication%20Technology.pdf)
Supplement: Supplementary file 1 [file COMP_CFP%20Modern%20Application%20on%20Information%20and%20Communication%20Technology.pdf]

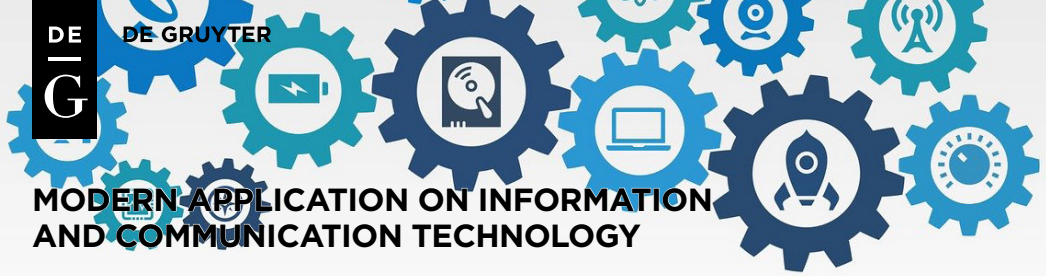

# MODERN APPLICATION ON INFORMATION AND COMMUNICATION TECHNOLOGY

## GUEST EDITORS

---

**Prof. Dr. Salah AlBermany**, Professor at Faculty of Computer Science and Mathematics, University of Kufa, Iraq

**Prof. Dr. Sara Paiva**, Associate Professor, Instituto Politécnico de Viana do Castelo, IEEE Senior Member, Portugal

**Dr. Ahmed J. Obaid**, lecturer at Faculty of Computer Science and Mathematics, University of Kufa, Iraq

**Dr. Shubham Sharma**, Ass. Prof at Advanced Materials Science and Energy, CSIR-Central Leather Research Institute, RCED, India

**Dr. Bassma H. Hamad**, Faculty Member at Dept. of Physics, College of Science, Al-Nahrain University, Baghdad, Iraq

## ADVISORY EDITORS

---

**Prof. Dr. Kadhim B. Swadi Al-Janabi**, Professor at Faculty of Computer Science and Mathematics, University of Kufa, Iraq

**Prof. Dr. Saleh Al-Karaawy**, Faculty Member at CSE., College of Engineering, The Technology University, Iraq

**Prof. Dr. P. Nagaradjane**, Lecturer at Department of Electronics and Communication Engineering, SSN, India

**Dr. Paulo Batista**, Researcher at CIDEHUS.UÉ-Interdisciplinary, Center HCS of the University of Évora, Portugal

**Dr. Hiba A. Ahmed**, Faculty Member at Mathematics Dept., College of science, Baghdad University, Iraq

## DESCRIPTION

---

Today Information and Communication Technology (ICT) assumes a significant job throughout everyday life. ICT is an all-inclusive term for Information Technology (IT), which gives access to data through media transmission. It is for the most part dependent on correspondence advancements. It coordinates PC framework/hand held framework, sound video show and Web. The most recent couple of decades have seen an enormous and sensational development in the field of Information and Communication Technology (ICT) in instruction likewise which has affected life of individuals particularly understudies here and there or the other. Information and Communication Technology (ICT) has on a very basic level changed business exchanges. While its uses have gotten pervasive in the propelled economies, rising and creating economies are as yet battling with the mode and way of the organization of ICT for business. This special issue is based on cooperation with „Modern Application on Information and Communication Technology Conference”.

## SCOPE

---

The topics of this special issue include, but are not limited to:

### COMPUTERS AND SECURITY SYSTEMS:

- ▶ Mobile & Cloud Computing
- ▶ Soft Computing

- ▶ Modeling and Simulation
- ▶ Computer Vision
- ▶ Embedded Systems
- ▶ Data Compression
- ▶ Data & Web Mining
- ▶ Bioinformatics & Bio-metrics Systems
- ▶ Information Systems Security

#### **COMMUNICATIONS AND NETWORKING:**

- ▶ Optical Communications
- ▶ Network Propagation
- ▶ Wireless Communication and Network
- ▶ RF Technology
- ▶ Wireless Communication and Broadcasting
- ▶ Cognitive Radio and Networks
- ▶ Spread-Spectrum Communication
- ▶ Internet of Things (IOT)
- ▶ Wireless Networks
- ▶ Software Defined Network
- ▶ Network Virtualization
- ▶ Optical Networking

#### **COMPUTING AND INFORMATICS:**

- ▶ NLP and Machine Translation
- ▶ Signal & Image Processing
- ▶ Bioinformatics and Systems Biology
- ▶ Biomedical Computing
- ▶ Computational Intelligence
- ▶ Artificial Intelligence and Machine Learning
- ▶ Robotics and Intelligent Control
- ▶ E-Learning System
- ▶ Pattern Recognition and Analysis
- ▶ Computer Architecture

## **HOW TO SUBMIT**

---

Before submission authors should carefully read the Instructions for Authors, which are located [here](#). All submissions to the Special Issue must be made electronically at via online submission system [Editorial Manager](#).

All manuscripts will go through the Open Computer Science high standards, quick, fair and comprehensive peer-review procedure.. When entering your submission via online submission system please choose the type article **Special Issue on Modern Application on Information**

The deadline for the submissions is **20th December, 2019**, but individual papers will be reviewed and published online as they arrive.

Contributors to the Special Issue will benefit from:

- ▶ Fair and constructive peer review provided by experts in the field
- ▶ **No space constraints**
- ▶ **NO submission and publication FEES**
- ▶ Convenient, web-based paper submission and tracking system – Editorial Manager
- ▶ Free language assistance for authors from non-English speaking regions
- ▶ Fast online publication of articles (continuous publication model)
- ▶ **Open Access** to your article for all interested readers
- ▶ indexation in **Web of Science (Emerging Sources Citation Index)** and **SCOPUS**
- ▶ **Long-time preservation** (articles archived in Portico)
- ▶ Extensive post-publication promotion

We are looking forward to your submission.

If you have any question, please contact us at [Natalia.Michalak@degruyter.com](mailto:Natalia.Michalak@degruyter.com) (Managing Editor ) or [sicc@uokufa.edu.iq](mailto:sicc@uokufa.edu.iq) (Guest Editor - Dr. Ahmed J. Obaid)
